# Supplementary material for: A layer by layer strategy for the TiO2/CuxO/CeO2hierarchical structure supported on carbon cloth as a photocarrier-assisted photothermal catalyst with fast visible light response
Source: Royal Society of Chemistry journal article supplement (doi:10.1039/d2qm01189a), 2023-01-01
Supplement: d2qm01189a1.pdf [file d2qm01189a1.pdf]

# **A Layer by Layer Strategy for the TiO<sub>2</sub>/Cu<sub>x</sub>O/CeO<sub>2</sub> Hierarchical Structure Supported on Carbon Cloth as A Photocatalyst-Assisted Photothermal Catalyst with Fast Visible Light Response**

*Mingzhe Shao,<sup>#a</sup> Xilan Feng,<sup>#b</sup> Dapeng Liu,<sup>\*a</sup> and Yu Zhang<sup>\*ac</sup>*

*M. Z. Shao, D. P. Liu, Y. Zhang*

*<sup>a</sup>Key Laboratory of Bio-inspired Smart Interfacial Science and Technology of Ministry of Education, School of Chemistry, Beihang University, Beijing 100191, P. R. China*

*E-mail: liudp@buaa.edu.cn; jade@buaa.edu.cn*

*X. L. Feng*

*<sup>b</sup>Department of Automation Science and Electrical Engineering, Beihang University, Beijing 100191, China*

*<sup>c</sup>Y. Zhang*

*Beijing Advanced Innovation Center for Biomedical Engineering, Beihang University, Beijing 100191, P. R. China*

*<sup>#</sup>These authors contribute equally to this work.*

*<sup>\*</sup>Corresponding author.*

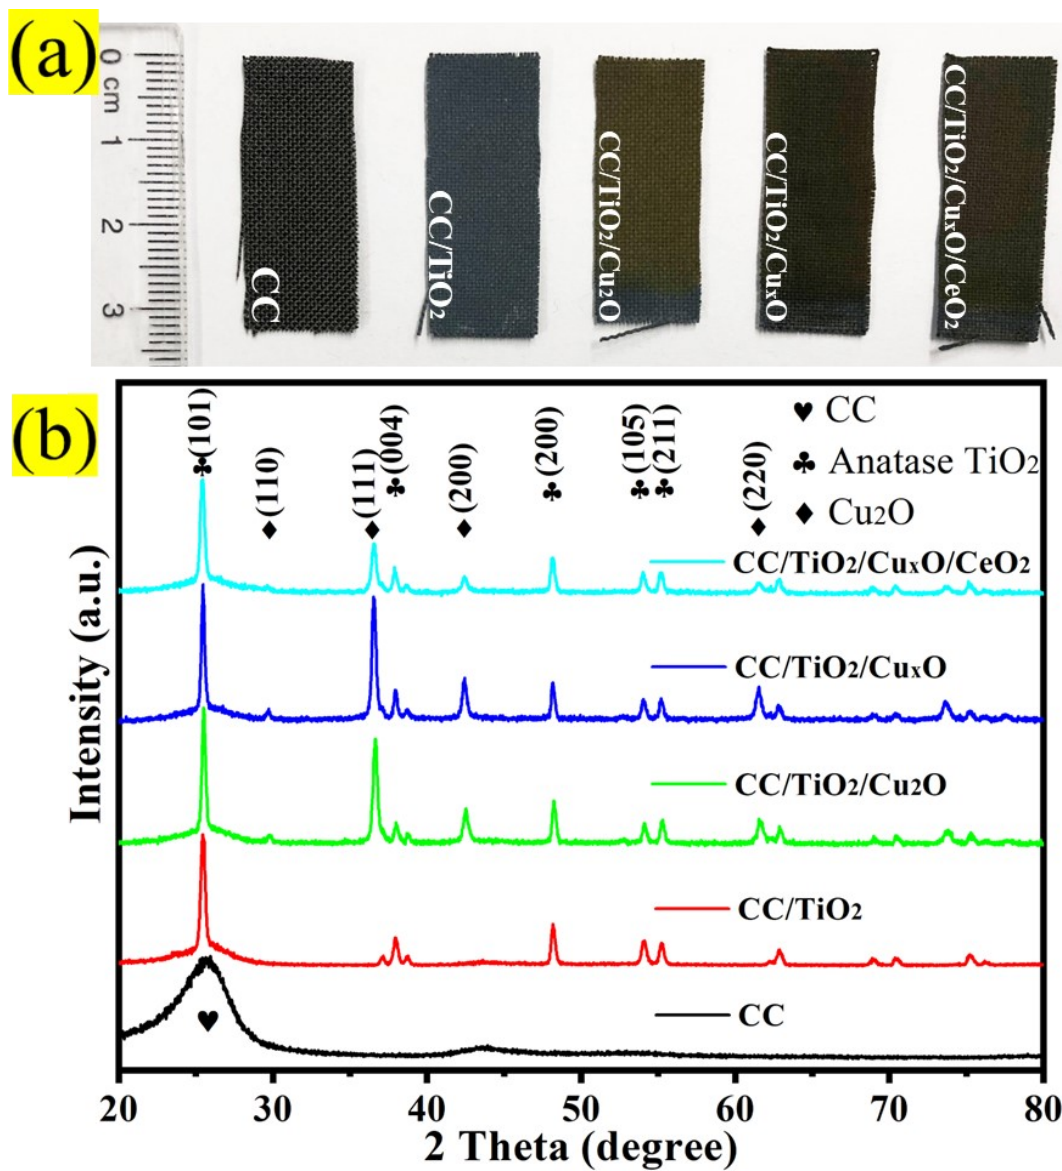

Figure S1. (a) Photos and (b) XRD patterns of CC, CC/TiO<sub>2</sub>, TiO<sub>2</sub>/Cu<sub>2</sub>O, CC/TiO<sub>2</sub>/Cu<sub>x</sub>O, and CC/TiO<sub>2</sub>/Cu<sub>x</sub>O/CeO<sub>2</sub>.

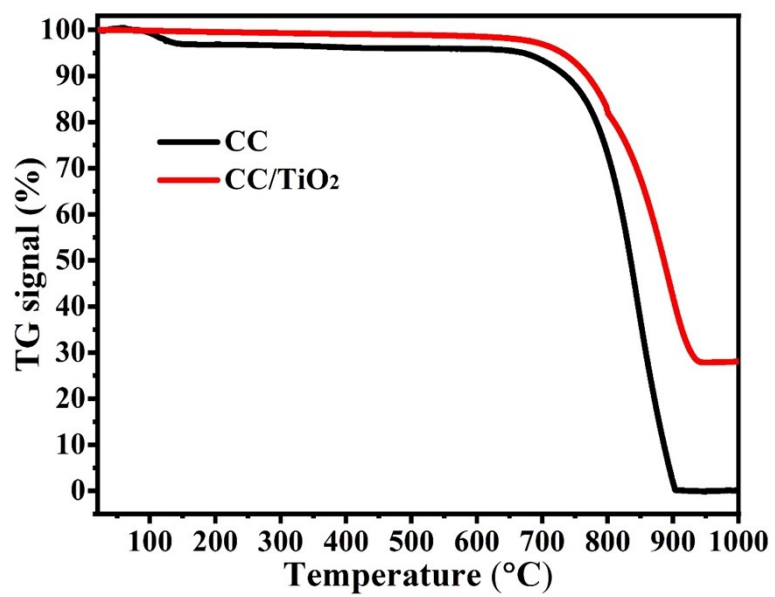

**Figure S2.** TG curves of CC and CC/TiO<sub>2</sub>.

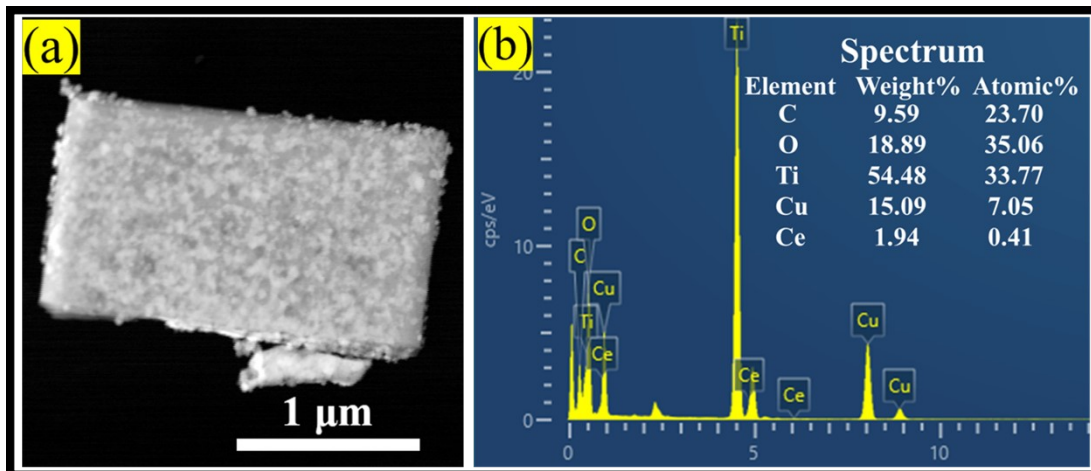

**Figure S3.** (a) Dark field TEM image, (b) EDS mapping spectrum of CC/TiO<sub>2</sub>/Cu<sub>x</sub>O/CeO<sub>2</sub>.

**Table S1.** ICP-OES data of TiO<sub>2</sub>/Cu<sub>2</sub>O, CC/TiO<sub>2</sub>/Cu<sub>x</sub>O, and TiO<sub>2</sub>/Cu<sub>x</sub>O/CeO<sub>2</sub>.

| <b>Sample</b>                                                 | <b>Ti (wt%)</b> | <b>Cu (wt%)</b> | <b>Ce (wt%)</b> |
|---------------------------------------------------------------|-----------------|-----------------|-----------------|
| <b>CC/TiO<sub>2</sub>/Cu<sub>2</sub>O</b>                     | 15.4470         | 12.0342         | —               |
| <b>CC/TiO<sub>2</sub>/Cu<sub>x</sub>O</b>                     | 14.9979         | 12.3343         | —               |
| <b>CC/TiO<sub>2</sub>/Cu<sub>x</sub>O/CeO<sub>2</sub>-100</b> | 15.4414         | 11.2320         | 0.1079          |
| <b>CC/TiO<sub>2</sub>/Cu<sub>x</sub>O/CeO<sub>2</sub>-200</b> | 14.5520         | 9.6343          | 0.0969          |
| <b>CC/TiO<sub>2</sub>/Cu<sub>x</sub>O/CeO<sub>2</sub>-300</b> | 14.1649         | 7.4602          | 0.0817          |
| <b>CC/TiO<sub>2</sub>/Cu<sub>x</sub>O/CeO<sub>2</sub>-400</b> | 13.4082         | 9.3194          | 0.0724          |

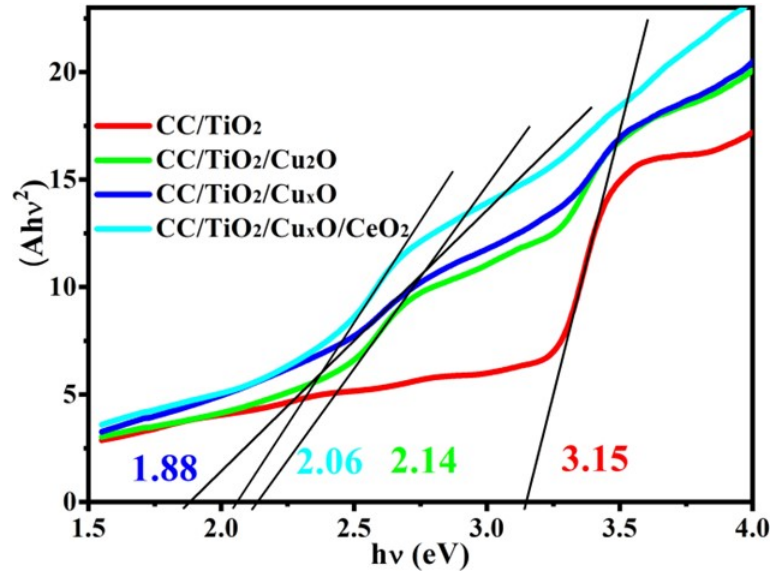

**Figure S4.** The plots of  $(Ahv)^2$  vs. photo energy ( $A$  represents the absorbance) of CC/TiO<sub>2</sub> (red), CC/TiO<sub>2</sub>/Cu<sub>2</sub>O (green), CC/TiO<sub>2</sub>/Cu<sub>x</sub>O (blue), and CC/TiO<sub>2</sub>/Cu<sub>x</sub>O/CeO<sub>2</sub> (cyan).

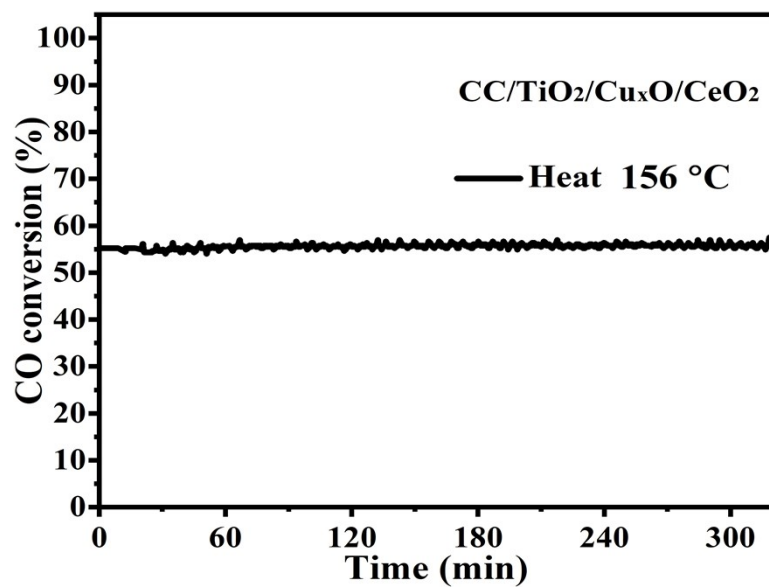

**Figure S5.** Thermal catalytic CO oxidation of CC/TiO<sub>2</sub>/Cu<sub>x</sub>O/CeO<sub>2</sub> for more than 6 h at 156 °C.

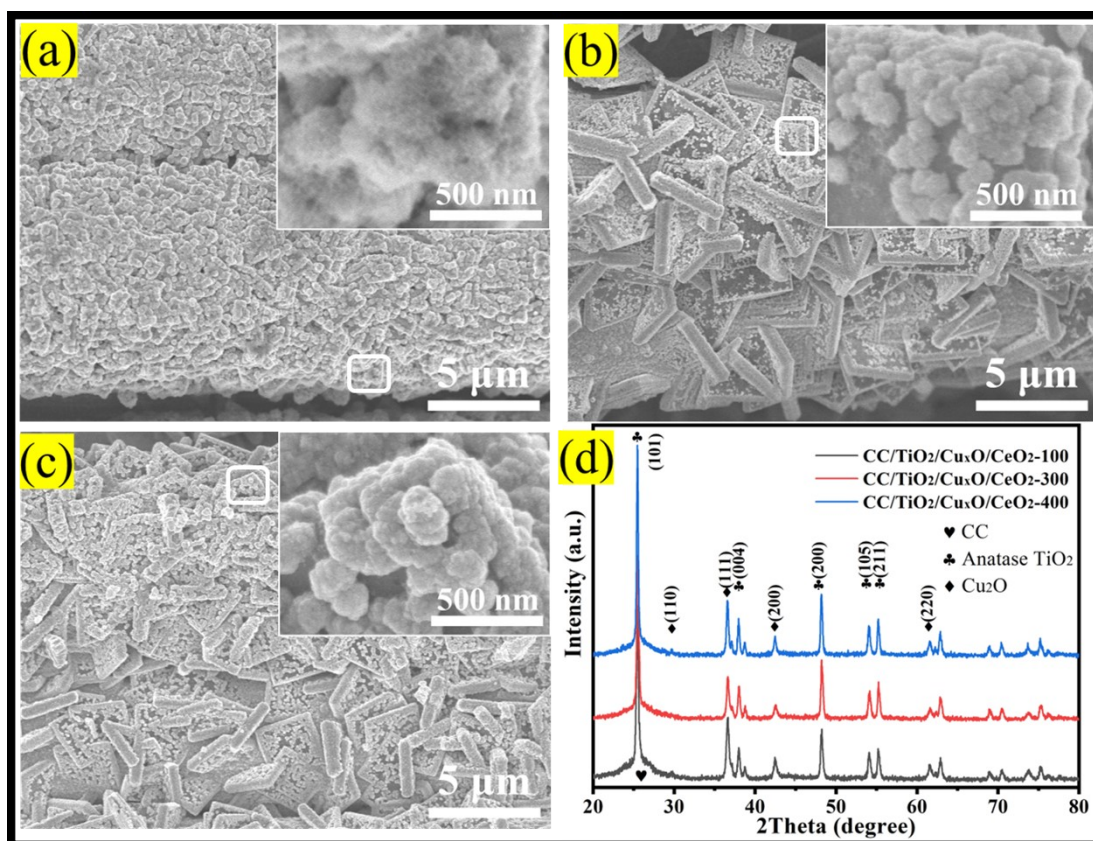

**Figure S6.** SEM images of (a) CC/TiO<sub>2</sub>/Cu<sub>x</sub>O/CeO<sub>2</sub>-100, (b) CC/TiO<sub>2</sub>/Cu<sub>x</sub>O/CeO<sub>2</sub>-300, (c) CC/TiO<sub>2</sub>/Cu<sub>x</sub>O/CeO<sub>2</sub>-400, and (d) XRD patterns of three samples. Insets: the enlarged view of samples.



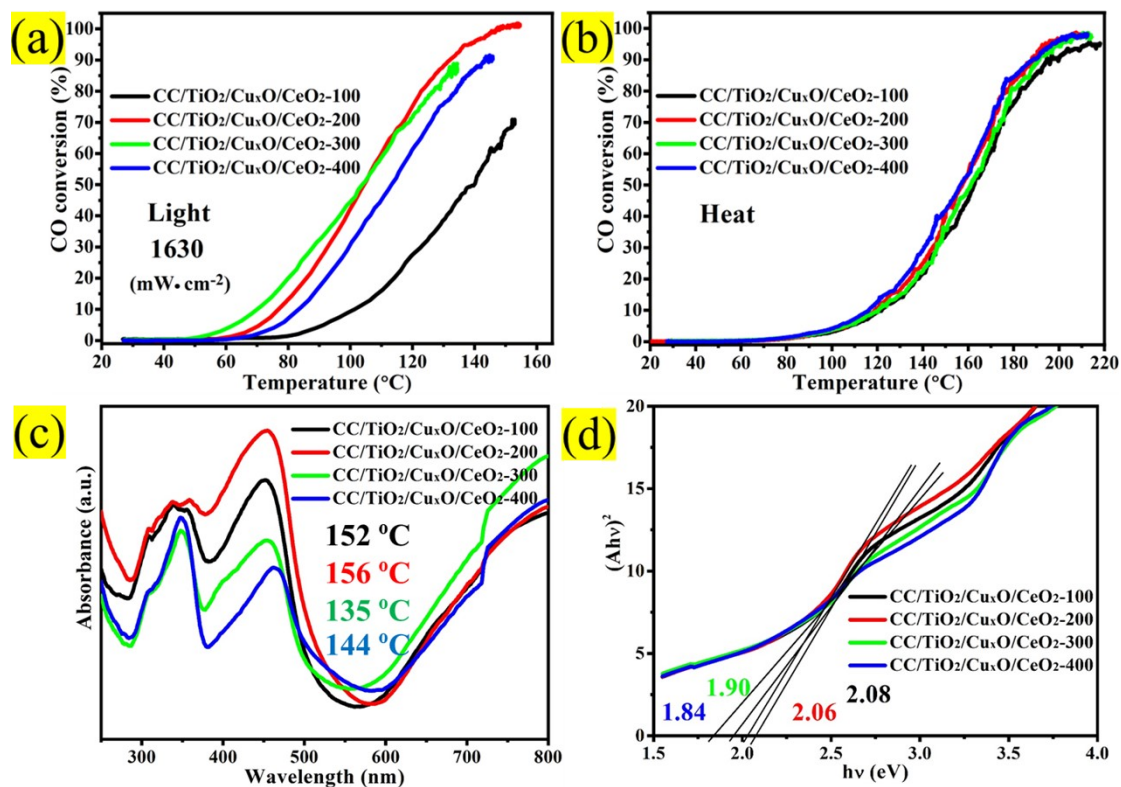

**Figure S7.** Catalytic CO oxidation curves (a) at 1630 mW cm<sup>-2</sup>, (b) under heating, (c) UV-vis diffuse reflectance absorption spectra, and (d) plots of  $(Ah\nu)^2$  vs photo energy of CC/TiO<sub>2</sub>/Cu<sub>x</sub>O/CeO<sub>2</sub>-100, -200, -300, -400.
